# Supplementary material for: Development of a Training Strategy Aimed at Increasing Veterinarians’ Awareness of the Proper Use of Antibiotics on Rabbit Farms
Source: MDPI journal article supplement (doi:10.3390/ani13152411), 2023-07-26
Supplement: s1 [file s1]

Table S1: The operational tool

| 1 - Characteristics of breeding and its management |                                 |                                                     |       |                         |                                    |                                                                                                |       |
|----------------------------------------------------|---------------------------------|-----------------------------------------------------|-------|-------------------------|------------------------------------|------------------------------------------------------------------------------------------------|-------|
| 1. Housing and prophylaxis                         |                                 |                                                     |       | 2. Nutrition management |                                    |                                                                                                |       |
| Biosecurity measures                               | Indirect prophylaxis            | Two cycles in the same housing facility             | notes | Feed                    | Feed stocking                      | Double silo use                                                                                | notes |
|                                                    |                                 | Regular disinfection                                |       |                         | Pellet composition                 | Differentiated grinding of fibrous part                                                        |       |
|                                                    |                                 | Rodent control program                              |       |                         | Feeding program                    | Separation of medicated and non-medicated feed                                                 |       |
|                                                    |                                 | Pest control program                                |       |                         |                                    | Restricted                                                                                     |       |
|                                                    |                                 | Presence of nets against birds                      |       |                         |                                    | Ad libitum                                                                                     |       |
|                                                    |                                 | Cleaning and removal of manure under cages          |       |                         | Presence of undesirable substances | Penicillins                                                                                    |       |
|                                                    |                                 | Manure management                                   |       |                         |                                    | Ionophores                                                                                     |       |
|                                                    |                                 | Carcass management (removal and disposal)           |       |                         |                                    | Mycotoxins                                                                                     |       |
|                                                    | Movement of vehicles and people | Presence of vehicle disinfection system (e.g. arch) |       | Water                   | Source                             | Well bored into underground aquifer (known water chemical and physical characteristics)        |       |
|                                                    |                                 | Presence of a disinfection area                     |       |                         |                                    | Aqueduct (known water hardness)                                                                |       |
|                                                    |                                 | Filter zone for changing clothes                    |       |                         | Distribution system                | Purification systems for well water                                                            |       |
|                                                    |                                 | Outside silos for unloading feed                    |       |                         |                                    | Water tanks and watering lines sanitation (frequency, incrustation and mucilage removal check) |       |
|                                                    |                                 | Entry register                                      |       | 3. Breeding sector      |                                    |                                                                                                |       |

|  |                                                                  |                                       |                           |                                       |                                   |                                                                                                     |              |
|--|------------------------------------------------------------------|---------------------------------------|---------------------------|---------------------------------------|-----------------------------------|-----------------------------------------------------------------------------------------------------|--------------|
|  | Introductio<br>n of new<br>breeders                              | The absence of pathology is certified |                           | Managem<br>ent of<br>new<br>breeders  | Housing<br>system<br>management   | Clean housing system                                                                                | <i>notes</i> |
|  | Semen<br>purchase                                                | The absence of pathology is certified |                           |                                       |                                   | Cage type                                                                                           |              |
|  | Critical<br>production<br>moments                                | Sanitation                            |                           |                                       |                                   | Type of ventilation, heating, watering<br>systems                                                   |              |
|  |                                                                  | Weaning                               |                           |                                       |                                   | Stocking density                                                                                    |              |
|  |                                                                  | Loading                               |                           |                                       | Introduction<br>of new<br>animals | Quarantine cages                                                                                    |              |
|  |                                                                  | Before kindling                       |                           |                                       |                                   | Prophylaxis                                                                                         |              |
|  | Physical<br>hygiene<br>methods<br>with<br>animals in<br>the farm | Removal of manure                     |                           |                                       | Feeding                           | Adequate daily feed intake                                                                          |              |
|  |                                                                  | Pressure washer with warm water       |                           |                                       |                                   | Controlled feed intake                                                                              |              |
|  |                                                                  | Pressure washer with detergents       |                           |                                       |                                   | Weight at first insemination                                                                        |              |
|  | Physical<br>hygiene<br>methods<br>without<br>animals in<br>farm  | Blowers                               |                           |                                       | Indirect<br>prophylaxis           | Before contacting other animals, future<br>parents are vaccinated and housed in<br>quarantine rooms |              |
|  |                                                                  | Pressure washer with warm water       |                           |                                       |                                   | Registered vaccine administration                                                                   |              |
|  |                                                                  | Pressure washer with detergents       |                           |                                       |                                   | Autogenous vaccine administration                                                                   |              |
|  |                                                                  | burners for cages and surfaces        |                           |                                       | Productive<br>rhythm              | Single band                                                                                         |              |
|  | Microclima<br>te                                                 | Risk factors<br>for disease<br>onset  | Quick temperature changes |                                       |                                   | Dual band                                                                                           |              |
|  |                                                                  |                                       | Warm and humid            |                                       | Hygiene of<br>equipment           | Correct use of single-use material (e.g.<br>needles.)                                               |              |
|  |                                                                  | Control of<br>microclimat             | Carbon dioxide            | Good<br>inseminat<br>ion<br>practices | Semen<br>purchase                 | Certified absence of pathology                                                                      |              |

|  |                                                     |                           |                         |                                        |                        |                                               |  |
|--|-----------------------------------------------------|---------------------------|-------------------------|----------------------------------------|------------------------|-----------------------------------------------|--|
|  | e<br>parameters<br>(air speed,<br>cooling,<br>etc.) | Ammonia                   |                         |                                        | Hormone<br>management  | Correct hormone dosage                        |  |
|  |                                                     | Temperature               |                         |                                        |                        | Heat induction hormones                       |  |
|  |                                                     | Humidity                  |                         |                                        |                        | Ovulation induction hormones                  |  |
|  | Control<br>systems                                  | Sensors and control units |                         | Kindling<br>and nest<br>managem<br>ent | Hygiene                | Setting up the nest with sterile<br>materials |  |
|  |                                                     |                           | Cleanliness of the nest |                                        |                        |                                               |  |
|  |                                                     |                           | Litter<br>balancing     |                                        | By parity order        |                                               |  |
|  |                                                     |                           |                         |                                        | Primiparous management |                                               |  |

## 2 - Diseases detectable on the farm

| Diagnosis and selection of the most appropriate intervention |                                                                |       |              |                                                                       |                                                 |       |              |                                                                                         |                                       |       |              |
|--------------------------------------------------------------|----------------------------------------------------------------|-------|--------------|-----------------------------------------------------------------------|-------------------------------------------------|-------|--------------|-----------------------------------------------------------------------------------------|---------------------------------------|-------|--------------|
| 1. Fattening sector: gastrointestinal pathologies            |                                                                |       |              | 2. Fattening sector: respiratory and integumentary system pathologies |                                                 |       |              | 3. Breeding sector (reproducing does): respiratory and integumentary system pathologies |                                       |       |              |
| Parameters considered                                        | Mortality                                                      | notes | Intervention | Parameters considered                                                 | Mortality                                       | notes | Intervention | Considered parameters                                                                   | Parity order                          | notes | Intervention |
|                                                              | Morbidity                                                      |       |              |                                                                       | Morbidity                                       |       |              |                                                                                         | Reproductive cycle phase              |       |              |
|                                                              | Temperature                                                    |       |              |                                                                       | Visit (animal and environment checks)           |       |              |                                                                                         | Morbidity                             |       |              |
|                                                              | Animals' age                                                   |       |              |                                                                       | Farm anamnesis                                  |       |              |                                                                                         | Visit (animal and environment checks) |       |              |
|                                                              | Number of days to slaughter                                    |       |              |                                                                       | Drugs used                                      |       |              |                                                                                         | Farm anamnesis                        |       |              |
|                                                              | Decrease in food consumption                                   |       |              |                                                                       | Number of days to slaughter                     |       |              |                                                                                         | Drugs used                            |       |              |
| Sampling                                                     | Sample type                                                    |       |              | Laboratory analysis                                                   | Anatomopathological examination                 |       |              | Laboratory tests                                                                        | Bacteriological tests                 |       |              |
|                                                              | Sample time (days after the problem onset)                     |       |              |                                                                       | Bacteriological tests                           |       |              |                                                                                         | Strain characterization               |       |              |
|                                                              | Ongoing medication influence on bacteriological investigations |       |              |                                                                       | Respiratory and/or integumentary panel of tests |       |              |                                                                                         | MIC                                   |       |              |
|                                                              | Sample size                                                    |       |              |                                                                       | MIC                                             |       |              |                                                                                         | Any additional test                   |       |              |
|                                                              | Sampling points within the shed                                |       |              |                                                                       | Any additional test                             |       |              | Sampling                                                                                | Sample type                           |       |              |
|                                                              |                                                                |       |              |                                                                       |                                                 |       |              |                                                                                         |                                       |       |              |

|                  |                                    |  |  |          |                                    |  |  |  |                                    |  |  |
|------------------|------------------------------------|--|--|----------|------------------------------------|--|--|--|------------------------------------|--|--|
|                  | Sample transport to the laboratory |  |  | Sampling | Sample type                        |  |  |  | Sample size                        |  |  |
| Laboratory tests | Anatomopathological examination    |  |  |          | Sample size                        |  |  |  | Sampling points within the shed    |  |  |
|                  | Bacteriological tests              |  |  |          | Sampling points within the shed    |  |  |  | Sample transport to the laboratory |  |  |
|                  | Parasitological tests              |  |  |          | Sample transport to the laboratory |  |  |  |                                    |  |  |
|                  | MIC                                |  |  |          |                                    |  |  |  |                                    |  |  |
|                  | Any additional test                |  |  |          |                                    |  |  |  |                                    |  |  |
